# Supplementary material for: Mental Health Impact of COVID-19 among Spanish Healthcare Workers. A 3-year follow-up study
Source: Research Square preprint supplement (doi:10.21203/rs.3.rs-7858075/v1), 2025-11-19
Supplement: Supplementary file 1 [file 9ee6f8bfd01265bcbe1f83dc.docx]

**Supplementary material – Mental Health Impact of COVID-19 among Spanish Healthcare Workers. A 3-year longitudinal study (MINDCOVID).**

**Jordi Alonso**

**Supplementary Figure 1. Flowchart MINDCOVID healthcare workers study.**

**Supplementary Table 1. Description of the healthcare workers participating in the MINDCOVID project at first assessment (May-September 2020).**

**Supplementary Table 2. Prevalence of any MD by distal factors**

**Supplementary Table 3. Prevalence of STB by distal factors.**

**Supplementary Table 4. Prevalence of major depression disorder by distal factors**

**Supplementary Table 5. Prevalence of generalized anxiety disorder by distal factors.**

**Supplementary Table 6. Prevalence of panic disorder by distal factors.**

**Supplementary Table 7. Prevalence of post-traumatic stress disorder by distal factors.**

**Supplementary Table 8. Prevalence of substance use disorder by distal factors.**

**Supplementary Table 9. Comparison of latent class growth analysis models for any probable mental disorder (MDx) and suicidal thoughts and behaviors (STB).**

**Supplementary Table 10. Any mental disorder 4-classes latent class growth analysis model.**

**Supplementary Table 11. Suicidal thoughts and behaviors 4-classes latent class growth analysis model.**

**Supplementary Figure 1. Flowchart MINDCOVID healthcare workers study.**


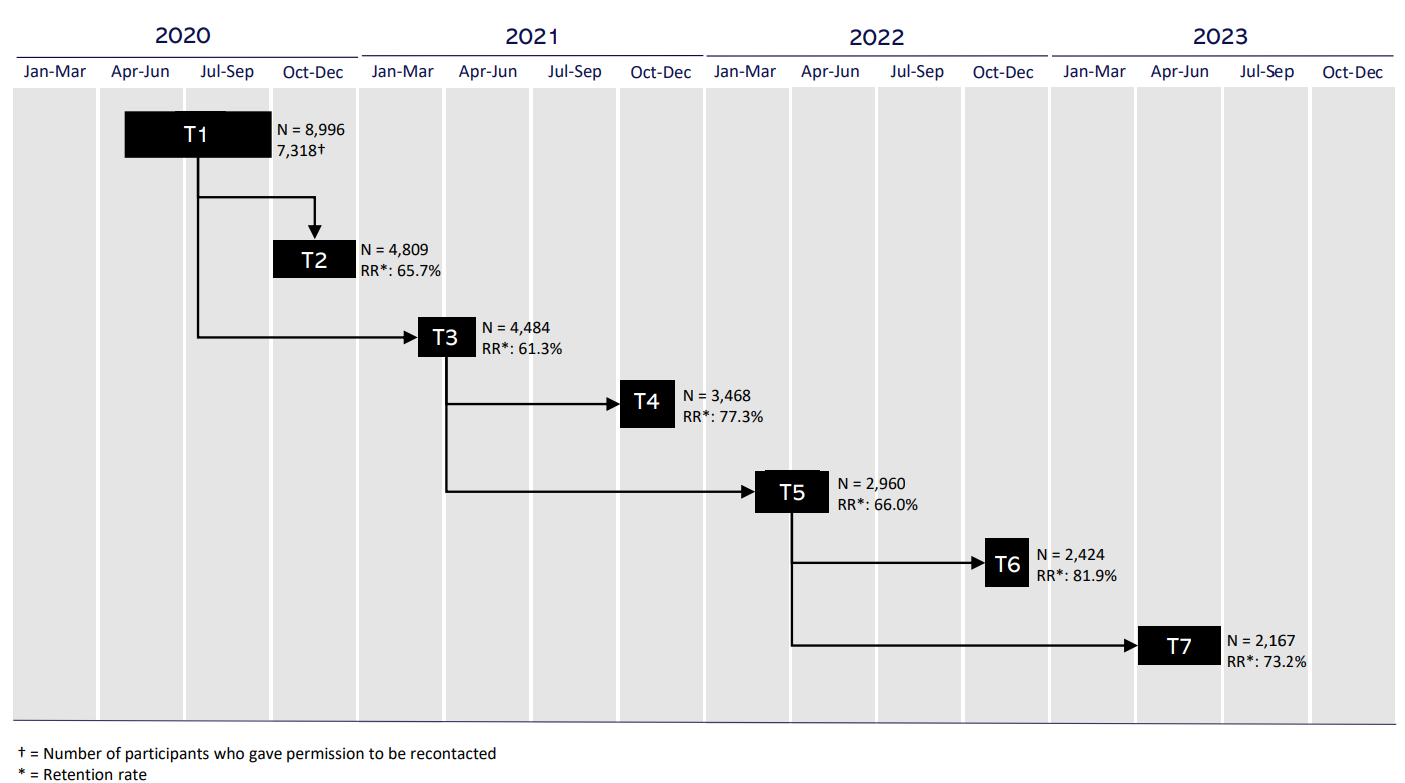


**Supplementary Table 1. Description of the** **healthcare workers participating in the MINDCOVID project at first assessment (May-September 2020).**

| Variable | n | % | SE |
| --- | --- | --- | --- |
| Total | 8996 | 100 |  |
| Age |  |  |  |
| 18-29 years old | 1176 | 10.8 | 1.7 |
| 30-49 years old | 4197 | 45.8 | 1.5 |
| 50 years old or more | 3623 | 43.4 | 2.7 |
| Female (vs. Male) | 7263 | 77.3 | 1.3 |
| Country of birth – Spain (vs. Other) | 8547 | 95.4 | 0.5 |
| Marital status - Single, divorced/separated or widowed (vs. Married) | 4393 | 47 | 2.1 |
| Children in care – Yes (vs. No) | 3610 | 40.9 | 1.5 |
| Profession |  |  |  |
| Medical doctor | 2877 | 26.2 | 2.8 |
| Nurse | 2657 | 30.8 | 1 |
| Nurse assistant | 877 | 13.6 | 3.1 |
| Other profession involved in patient care | 972 | 9.2 | 0.8 |
| Other profession not involved in patient care | 1613 | 20.3 | 2.1 |
| Workplace |  |  |  |
| Hospital | 5456 | 57.6 | 13.6 |
| Primary Care | 2739 | 35.6 | 14.2 |
| Others | 801 | 6.8 | 1.3 |
| Number of pre-pandemic lifetime mental disorders |  |  |  |
| None | 5380 | 59.5 | 0.8 |
| Exactly one | 2895 | 32.3 | 0.7 |
| Two or more | 721 | 8.2 | 0.4 |
| Number of physical health conditions |  |  |  |
| None | 6837 | 74.6 | 0.9 |
| Exactly one | 1878 | 21.8 | 0.7 |
| Two or more | 281 | 3.6 | 0.3 |
| Average weekly hours worked |  |  |  |
| 40 hours or less | 5425 | 63.2 | 2.1 |
| 41-50 hours | 2103 | 21.5 | 2.1 |
| 51 hours or more | 1468 | 15.3 | 1 |
| Changes at work |  |  |  |
| No changes | 3865 | 45.2 | 1.5 |
| Changed of team or assigned functions | 3018 | 34 | 3.3 |
| Changed to specific COVID-19 related work location | 2113 | 20.8 | 3.6 |
| Frequency of direct exposure to COVID-19 patients at workplace |  |  |  |
| Never | 1163 | 12 | 2.1 |
| 1 | 1162 | 14.1 | 1.5 |
| 2 | 2557 | 30.2 | 2.6 |
| 3 | 1886 | 20.6 | 2 |
| Always | 2228 | 23.1 | 3.1 |
| Perceived lack of preparedness at work |  |  |  |
| Never | 671 | 8.6 | 1.4 |
| 1 | 1838 | 21.3 | 2.1 |
| 2 | 3314 | 35.9 | 0.7 |
| 3 | 2330 | 25.1 | 2 |
| Always | 843 | 9 | 1.1 |
| Perceived frequency of lack of protective equipment at work |  |  |  |
| Never | 986 | 10.9 | 1.3 |
| 1 | 1239 | 14.4 | 1 |
| 2 | 3324 | 36.8 | 1.1 |
| 3 | 2333 | 25.5 | 1.6 |
| Always | 1114 | 12.5 | 1,1 |
| Having to make decisions at work regarding prioritizing care among COVID-19 patients (vs. Not having to make them) | 1633 | 16.4 | 1.6 |
| Having patient(s) in care that died from COVID-19 infection (vs. Not having them) | 3538 | 36.9 | 3 |
| Personal health-related stress |  |  |  |
| None | 447 | 5.5 | 0.7 |
| 1 | 2385 | 25.4 | 1 |
| 2 | 3179 | 35 | 0.8 |
| 3 | 2164 | 24.3 | 0.9 |
| Very intense | 821 | 9.8 | 0.9 |
| Health-related stress loved ones |  |  |  |
| None | 75 | 1 | 0.2 |
| 1 | 774 | 9.3 | 1.1 |
| 2 | 2439 | 26.6 | 1.1 |
| 3 | 2836 | 31.3 | 0.6 |
| Very intense | 2872 | 31.7 | 2.1 |
| Significant loss of personal/familiar income due to COVID-19 (vs. No) | 1735 | 19.6 | 0.7 |
| Financial – Financial stress |  |  |  |
| None | 2721 | 29.3 | 0.8 |
| 1 | 3017 | 32.9 | 0.6 |
| 2 | 1859 | 21.2 | 0.6 |
| 3 | 952 | 11.2 | 0.6 |
| Very intense | 447 | 5.3 | 0.5 |
| Stress related to relations with others |  |  |  |
| None | 806 | 9.1 | 0.8 |
| 1 | 2900 | 31.4 | 1.1 |
| 2 | 3036 | 33.2 | 1 |
| 3 | 1832 | 21.3 | 0.8 |
| Very intense | 422 | 4.9 | 0.4 |
| No positive COVID-19 test or medical diagnosis (vs. positive) | 7347 | 82.7 | 2.2 |
| Close ones infected with COVID-19 (vs. no close ones infected) | 5651 | 58.9 | 3.5 |

**Supplementary Table 2. Prevalence of any MD by distal factors**

|  | **TIME 1** | | | **TIME 2** | | | **TIME 3** | | | **TIME 4** | | | **TIME 5** | | | **TIME 6** | | | **TIME 7** | | |
| --- | --- | --- | --- | --- | --- | --- | --- | --- | --- | --- | --- | --- | --- | --- | --- | --- | --- | --- | --- | --- | --- |
|  | **n** | **%** | **SE** | **n** | **%** | **SE** | **n** | **%** | **SE** | **n** | **%** | **SE** | **n** | **%** | **SE** | **n** | **%** | **SE** | **n** | **%** | **SE** |
| TOTAL | 4059 | 45.8 | 1.8 | 1856 | 42.6 | 1.9 | 1688 | 41.4 | 1.2 | 995 | 33.5 | 1.3 | 865 | 32.9 | 1.4 | 654 | 31.1 | 1.7 | 615 | 31.2 | 1.6 |
| 18-29 years old | 658 | 54.6 | 2.8 | 221 | 46.8 | 2.7 | 197 | 46.2 | 2.7 | 99 | 37.6 | 2.3 | 81 | 37.3 | 3.4 | 47 | 31.4 | 3.7 | 44 | 32.1 | 3.8 |
| 30-49 years old | 1950 | 49.1 | 1.6 | 897 | 44.9 | 2.3 | 809 | 42.7 | 1.4 | 476 | 34.8 | 2 | 395 | 33 | 1.5 | 311 | 31.9 | 2 | 294 | 32.5 | 1.8 |
| 50 years old or more | 1451 | 40.1 | 2.5 | 738 | 39.1 | 2 | 682 | 38.7 | 2 | 420 | 31 | 1.2 | 389 | 31.7 | 2.2 | 296 | 30.3 | 1.8 | 277 | 29.7 | 2.2 |
| Male | 620 | 36.4 | 1.7 | 297 | 37.9 | 1.7 | 283 | 35.5 | 2 | 176 | 30.7 | 3.2 | 146 | 28.9 | 2.4 | 123 | 32 | 3.1 | 113 | 29.6 | 2.3 |
| Female | 3439 | 48.6 | 2 | 1559 | 44 | 2.1 | 1405 | 43.1 | 1.2 | 819 | 34.3 | 1.5 | 719 | 34 | 1.7 | 531 | 30.9 | 1.7 | 502 | 31.7 | 1.7 |
| Country of birth - Spain | 3829 | 45.5 | 1.9 | 1755 | 42.3 | 1.9 | 1607 | 41.1 | 1.3 | 938 | 32.7 | 1.4 | 820 | 32.5 | 1.4 | 620 | 30.7 | 1.7 | 586 | 31.2 | 1.6 |
| Country of birth - Other | 230 | 52.5 | 2.3 | 101 | 48.9 | 3.3 | 81 | 46.2 | 4 | 57 | 48.9 | 5.7 | 45 | 41.4 | 6.5 | 34 | 39.3 | 3.4 | 29 | 31.8 | 4.1 |
| Married | 1939 | 42.9 | 2.1 | 938 | 41 | 1.6 | 839 | 38.1 | 1.6 | 496 | 29.8 | 1.4 | 438 | 29.2 | 2.1 | 354 | 30 | 2 | 319 | 29.1 | 1.8 |
| Single, divorced/separated or widowed | 2120 | 49.1 | 1.6 | 918 | 44.4 | 2.8 | 849 | 44.9 | 1.1 | 499 | 37.5 | 1.7 | 427 | 36.9 | 1.5 | 300 | 32.4 | 1.6 | 296 | 33.6 | 1.8 |
| No children in care | 2468 | 46.4 | 1.9 | 1125 | 43.5 | 2.3 | 1021 | 43.1 | 1.7 | 595 | 34.9 | 1.7 | 522 | 34.7 | 1.6 | 371 | 30.9 | 1.6 | 376 | 32.8 | 2 |
| Children in care | 1591 | 45 | 2.2 | 731 | 41.3 | 2.1 | 667 | 38.8 | 1.1 | 400 | 31.6 | 1.8 | 343 | 30.3 | 1.9 | 283 | 31.5 | 2.1 | 239 | 29 | 1.9 |
| Workplace - Hospital | 2521 | 47 | 2.6 | 1055 | 41.9 | 2.5 | 990 | 43.2 | 1.3 | 578 | 34.3 | 2 | 504 | 33.9 | 1.8 | 373 | 32 | 1.9 | 355 | 32.7 | 1.6 |
| Workplace - Primary Care | 1214 | 45 | 1.5 | 664 | 45 | 1.7 | 562 | 39.3 | 2.3 | 354 | 33.8 | 1.6 | 305 | 32.6 | 2.4 | 242 | 31.7 | 2.4 | 221 | 31 | 2.5 |
| Workplace - Others | 324 | 39.7 | 3.1 | 137 | 35.3 | 2.9 | 136 | 36.2 | 4.4 | 63 | 25 | 4.4 | 56 | 24.9 | 4.1 | 39 | 19.9 | 5.3 | 39 | 19.5 | 4.5 |
| Medical doctor | 1051 | 35.7 | 1.5 | 568 | 35.2 | 2.8 | 466 | 29.8 | 2.3 | 290 | 26.5 | 1 | 252 | 24.9 | 1.7 | 205 | 25.5 | 2.5 | 189 | 25 | 1.4 |
| Nurse | 1379 | 50.6 | 2.2 | 582 | 43.4 | 2.4 | 574 | 45.2 | 2.3 | 301 | 31 | 2 | 275 | 32.7 | 2.5 | 211 | 32.7 | 2.1 | 187 | 31.9 | 1.7 |
| Nurse assistant | 526 | 59.4 | 3.8 | 192 | 53.8 | 3.9 | 161 | 54 | 2.8 | 95 | 46.6 | 4.5 | 85 | 46.1 | 4.2 | 55 | 38.9 | 4 | 51 | 39 | 3.9 |
| Other, involving patient care | 400 | 40.4 | 2.9 | 211 | 41 | 3.6 | 189 | 39.6 | 4.3 | 121 | 35.2 | 2.9 | 101 | 31.7 | 2.7 | 77 | 32.4 | 3.4 | 79 | 38.2 | 4.4 |
| Other, not involving patient care | 703 | 44.9 | 3.7 | 303 | 44.4 | 4.6 | 298 | 42.9 | 3.3 | 188 | 37.1 | 5.1 | 152 | 36.5 | 3.8 | 106 | 31.2 | 3.3 | 109 | 30.9 | 3.5 |
| No pre-pandemic mental disorders | 1834 | 34.3 | 1.9 | 829 | 32.7 | 1.9 | 753 | 30.7 | 1.5 | 432 | 24.3 | 1.3 | 390 | 24.7 | 1.3 | 274 | 21.5 | 2.3 | 272 | 23.7 | 1.8 |
| 1 pre-pandemic mental disorders | 1665 | 59 | 1.8 | 782 | 53.9 | 2.8 | 706 | 53.7 | 1.1 | 420 | 42.9 | 3.2 | 356 | 41.8 | 2.2 | 286 | 42.4 | 1.8 | 259 | 40 | 1.9 |
| ≥2 pre-pandemic mental disorders | 560 | 77.1 | 2.2 | 245 | 66.3 | 5 | 229 | 67 | 3.5 | 143 | 59.6 | 4.8 | 119 | 55.6 | 4.3 | 94 | 53.7 | 5.1 | 84 | 49.5 | 5.1 |
| No physical health conditions | 2954 | 44.1 | 1.8 | 1309 | 40.3 | 2 | 1193 | 38.8 | 1.4 | 707 | 31.3 | 1.5 | 600 | 29.9 | 1.5 | 460 | 29 | 1.7 | 426 | 28.4 | 1.6 |
| 1 physical health condition | 937 | 49.3 | 2.4 | 452 | 47 | 2.1 | 416 | 47 | 1.8 | 240 | 38.8 | 2.5 | 226 | 40.2 | 2.6 | 168 | 36 | 2.9 | 156 | 36 | 3.8 |
| ≥2 physical health conditions | 168 | 60.2 | 4.3 | 95 | 61.9 | 4.2 | 79 | 56.3 | 7.4 | 48 | 45.1 | 5.6 | 39 | 52.5 | 6.1 | 26 | 43.6 | 4.9 | 33 | 56.9 | 5.1 |

**Supplementary Table 3. Prevalence of STB by distal factors.**

|  | **TIME 1** | | | **TIME 2** | | | **TIME 3** | | | **TIME 4** | | | **TIME 5** | | | **TIME 6** | | | **TIME 7** | | |
| --- | --- | --- | --- | --- | --- | --- | --- | --- | --- | --- | --- | --- | --- | --- | --- | --- | --- | --- | --- | --- | --- |
|  | **n** | **%** | **SE** | **n** | **%** | **SE** | **n** | **%** | **SE** | **n** | **%** | **SE** | **n** | **%** | **SE** | **n** | **%** | **SE** | **n** | **%** | **SE** |
| TOTAL | 732 | 8.4 | 0.4 | 374 | 8.4 | 0.6 | 343 | 8.9 | 0.6 | 274 | 8.6 | 0.7 | 245 | 8.7 | 0.6 | 188 | 9.1 | 0.8 | 177 | 9.4 | 0.6 |
| 18-29 years old | 126 | 11.3 | 1.6 | 54 | 9.7 | 1.9 | 44 | 10.6 | 1.3 | 21 | 10 | 2.5 | 14 | 5 | 1.3 | 13 | 7.4 | 2.3 | 8 | 4.6 | 2 |
| 30-49 years old | 316 | 7.9 | 0.5 | 165 | 8 | 0.7 | 150 | 8.4 | 0.9 | 123 | 7.9 | 1 | 111 | 8.6 | 0.6 | 85 | 9.5 | 0.9 | 83 | 10.4 | 1.1 |
| 50 years old or more | 290 | 8.1 | 0.6 | 155 | 8.5 | 0.9 | 149 | 9 | 0.8 | 130 | 9.1 | 0.8 | 120 | 9.6 | 1 | 90 | 9.2 | 1 | 86 | 9.4 | 1.4 |
| Male | 140 | 8.7 | 0.8 | 73 | 8.6 | 1.1 | 64 | 8.6 | 0.9 | 48 | 8 | 1.2 | 40 | 8.7 | 1.4 | 37 | 10.1 | 1.5 | 35 | 9.1 | 1.6 |
| Female | 592 | 8.3 | 0.4 | 301 | 8.4 | 0.6 | 279 | 9 | 0.8 | 226 | 8.8 | 0.8 | 205 | 8.7 | 0.6 | 151 | 8.9 | 0.9 | 142 | 9.4 | 0.5 |
| Country of birth - Spain | 676 | 8.1 | 0.5 | 356 | 8.4 | 0.7 | 320 | 8.6 | 0.6 | 262 | 8.4 | 0.8 | 234 | 8.5 | 0.6 | 180 | 9.1 | 0.8 | 169 | 9.3 | 0.6 |
| Country of birth - Other | 56 | 13.3 | 1.6 | 18 | 8.7 | 3.4 | 23 | 14.9 | 4.1 | 12 | 13.1 | 4.5 | 11 | 11.3 | 2.7 | 8 | 9 | 2.6 | 8 | 10.9 | 3.5 |
| Married | 302 | 6.4 | 0.6 | 160 | 6.3 | 0.7 | 155 | 7.6 | 0.9 | 144 | 8.4 | 0.8 | 132 | 8.4 | 0.7 | 104 | 8.8 | 0.8 | 97 | 9.2 | 1.1 |
| Single, divorced/separated or widowed | 430 | 10.6 | 0.8 | 214 | 10.8 | 0.9 | 188 | 10.4 | 0.8 | 130 | 8.9 | 1.1 | 113 | 9 | 1.1 | 84 | 9.5 | 1.2 | 80 | 9.5 | 0.7 |
| No children in care | 480 | 9.4 | 0.5 | 249 | 9.7 | 0.6 | 227 | 10.5 | 1 | 174 | 9.8 | 0.8 | 150 | 9 | 0.8 | 120 | 9.9 | 0.9 | 112 | 9.9 | 0.7 |
| Children in care | 252 | 6.9 | 0.7 | 125 | 6.6 | 0.7 | 116 | 6.7 | 0.8 | 100 | 7 | 1 | 95 | 8.2 | 0.8 | 68 | 8.1 | 0.9 | 65 | 8.7 | 1.2 |
| Workplace - Hospital | 420 | 7.9 | 0.6 | 212 | 8.1 | 0.6 | 177 | 8.2 | 0.6 | 144 | 8.5 | 0.8 | 129 | 8.1 | 1 | 97 | 8.1 | 0.8 | 94 | 8.8 | 0.8 |
| Workplace - Primary Care | 251 | 9.4 | 0.3 | 140 | 9.4 | 1 | 131 | 9.7 | 0.9 | 111 | 9.5 | 1.4 | 95 | 9.5 | 0.7 | 78 | 11.1 | 0.8 | 73 | 10.9 | 1.1 |
| Workplace - Others | 61 | 7 | 0.9 | 22 | 5.7 | 1.9 | 35 | 10.8 | 3 | 19 | 5 | 1.7 | 21 | 8.9 | 1.9 | 13 | 8.2 | 2.3 | 10 | 6.4 | 1.9 |
| Medical doctor | 233 | 7.9 | 0.6 | 125 | 7.8 | 0.7 | 105 | 6.4 | 0.7 | 83 | 6.6 | 1.1 | 77 | 6.3 | 0.9 | 58 | 6.6 | 0.9 | 48 | 6.1 | 1.4 |
| Nurse | 223 | 8 | 0.5 | 97 | 6.2 | 0.9 | 101 | 7.4 | 1.1 | 83 | 7.7 | 1.3 | 78 | 8.8 | 0.9 | 61 | 9.3 | 0.9 | 62 | 9.7 | 1.1 |
| Nurse assistant | 84 | 10.6 | 1.4 | 40 | 12.4 | 2.5 | 33 | 12.8 | 2.9 | 21 | 12.6 | 3.2 | 19 | 11.2 | 3.9 | 17 | 12 | 2.9 | 19 | 15.3 | 3.4 |
| Other, involving patient care | 71 | 7.7 | 0.9 | 57 | 11.7 | 1.5 | 38 | 7.8 | 2.1 | 35 | 8.9 | 1.5 | 28 | 8.2 | 1.1 | 22 | 9.2 | 1.9 | 13 | 7.1 | 1.5 |
| Other, not involving patient care | 121 | 8.4 | 1 | 55 | 8.5 | 1.5 | 66 | 12.3 | 1.7 | 52 | 9.9 | 1.1 | 43 | 10.5 | 2 | 30 | 10.7 | 4 | 35 | 11 | 2.5 |
| No pre-pandemic mental disorders | 260 | 4.8 | 0.3 | 140 | 5.1 | 0.5 | 125 | 5 | 0.6 | 102 | 5.6 | 0.7 | 92 | 5.6 | 0.6 | 76 | 6.3 | 0.6 | 70 | 6.9 | 0.9 |
| 1 pre-pandemic mental disorders | 280 | 10.2 | 0.6 | 161 | 11.1 | 1 | 150 | 12.7 | 1.3 | 131 | 11.8 | 1.3 | 111 | 11.5 | 1.2 | 79 | 11.5 | 1.4 | 72 | 10.8 | 1.3 |
| ≥2 pre-pandemic mental disorders | 192 | 26.8 | 2 | 73 | 20.6 | 2.4 | 68 | 21.3 | 3.2 | 41 | 17.2 | 2.5 | 42 | 19 | 2.8 | 33 | 19.8 | 3.3 | 35 | 22.1 | 1.8 |
| No physical health conditions | 527 | 7.9 | 0.4 | 257 | 7.6 | 0.5 | 243 | 8.4 | 0.7 | 184 | 7.7 | 0.8 | 166 | 7.7 | 0.5 | 131 | 8.2 | 0.8 | 122 | 8.3 | 0.8 |
| 1 physical health condition | 167 | 8.8 | 0.9 | 95 | 10.2 | 1 | 83 | 10.1 | 1.5 | 75 | 11.1 | 1.1 | 63 | 10.9 | 1.5 | 47 | 11.7 | 1.3 | 45 | 12 | 1.8 |
| ≥2 physical health conditions | 38 | 15.7 | 2.3 | 22 | 14.5 | 3 | 17 | 11.2 | 3 | 15 | 12.8 | 3.3 | 16 | 16.1 | 3.5 | 10 | 12.3 | 3.2 | 10 | 14.9 | 6.5 |

**Supplementary Table 4. Prevalence of major depression disorder by distal factors**

|  | **TIME 1** | | | | | **TIME 2** | | | | **TIME 3** | | | | **TIME 4** | | | | **TIME 5** | | | | **TIME 6** | | | | **TIME 7** | |
| --- | --- | --- | --- | --- | --- | --- | --- | --- | --- | --- | --- | --- | --- | --- | --- | --- | --- | --- | --- | --- | --- | --- | --- | --- | --- | --- | --- |
|  | **n** | **%** | **SE** | **n** | **%** | | **SE** | **n** | **%** | | **SE** | **n** | **%** | | **SE** | **n** | **%** | | **SE** | **n** | **%** | | **SE** | **n** | **%** | | **SE** |
| TOTAL | 2508 | 27,9 | 1,9 | 1078 | 24,1 | | 1,8 | 1046 | 25,5 | | 1,4 | 518 | 18,1 | | 1,1 | 498 | 19 | | 1,1 | 345 | 16,6 | | 1,2 | 331 | 18,2 | | 1,3 |
| 18-29 years old | 410 | 33,5 | 2,9 | 125 | 27,4 | | 3,1 | 96 | 25 | | 2,2 | 40 | 19,3 | | 2,5 | 39 | 18,1 | | 1,7 | 24 | 15,7 | | 2,9 | 22 | 16,4 | | 2,2 |
| 30-49 years old | 1188 | 30 | 1,8 | 501 | 24,6 | | 1,9 | 501 | 26,7 | | 1,7 | 243 | 18,7 | | 2 | 216 | 18,4 | | 1,4 | 156 | 16,7 | | 1,4 | 156 | 18,3 | | 1,8 |
| 50 years old or more | 910 | 24,4 | 2,4 | 452 | 22,8 | | 2,3 | 449 | 24,4 | | 2 | 235 | 17,2 | | 1,3 | 243 | 19,9 | | 1,8 | 165 | 16,7 | | 1,7 | 153 | 18,4 | | 1,4 |
| Male | 345 | 20 | 1,3 | 158 | 20,4 | | 1,5 | 156 | 19,5 | | 1,8 | 89 | 16,7 | | 2,2 | 70 | 13,9 | | 2 | 52 | 14,1 | | 2,3 | 48 | 14,6 | | 1,9 |
| Female | 2163 | 30,3 | 2 | 920 | 25,2 | | 2,1 | 890 | 27,3 | | 1,4 | 429 | 18,5 | | 1,1 | 428 | 20,4 | | 1,3 | 293 | 17,2 | | 1,2 | 283 | 19,1 | | 1,6 |
| Medical doctor | 677 | 22,4 | 1,9 | 337 | 20,6 | | 2,4 | 291 | 18 | | 2,2 | 147 | 14 | | 1,4 | 139 | 13,2 | | 1,8 | 105 | 12,9 | | 1,7 | 91 | 11,4 | | 1,1 |
| Nurse | 876 | 31,3 | 2,5 | 347 | 25,6 | | 2 | 358 | 27,7 | | 1,4 | 153 | 15,8 | | 1,3 | 169 | 19,9 | | 1,5 | 119 | 18,4 | | 1,4 | 111 | 19,5 | | 1,7 |
| Nurse assistant | 336 | 38 | 4,2 | 106 | 29,5 | | 3 | 114 | 37,3 | | 3,2 | 52 | 27,1 | | 3,8 | 53 | 28,5 | | 3,6 | 33 | 23,4 | | 3,3 | 35 | 28 | | 4,3 |
| Other, involving patient care | 214 | 21,9 | 1,5 | 122 | 20,7 | | 3,1 | 111 | 22,6 | | 2,5 | 62 | 16,5 | | 2,5 | 49 | 15,6 | | 2,2 | 36 | 14,6 | | 2 | 36 | 19,2 | | 4 |
| Other, not involving patient care | 405 | 26,1 | 3 | 166 | 24,5 | | 4,1 | 172 | 25,5 | | 2,4 | 104 | 21,8 | | 3,7 | 88 | 21,4 | | 3,5 | 52 | 15,5 | | 2,6 | 58 | 18,8 | | 3 |
| No pre-pandemic mental disorders | 1086 | 20 | 1,6 | 484 | 18,8 | | 1,5 | 454 | 18,6 | | 1,6 | 217 | 12,3 | | 1 | 216 | 13,9 | | 1,1 | 142 | 11,4 | | 1,1 | 148 | 14,2 | | 1,6 |
| 1 pre-pandemic mental disorders | 1016 | 35,8 | 2,1 | 426 | 28,6 | | 3 | 443 | 33,4 | | 1,5 | 217 | 24,1 | | 3 | 204 | 23,2 | | 1,5 | 151 | 22,7 | | 1,6 | 132 | 21,8 | | 1,8 |
| ≥2 pre-pandemic mental disorders | 406 | 54,4 | 2,9 | 168 | 43,8 | | 4,7 | 149 | 43,5 | | 3,2 | 84 | 35,2 | | 5,5 | 78 | 38,7 | | 3,7 | 52 | 28,5 | | 4,1 | 51 | 32,6 | | 4,7 |

**Supplementary Table 5. Prevalence of generalized anxiety disorder by distal factors.**

|  | **TIME 1** | | | | | **TIME 2** | | | | **TIME 3** | | | | **TIME 4** | | | | **TIME 5** | | | | **TIME 6** | | | | **TIME 7** | |
| --- | --- | --- | --- | --- | --- | --- | --- | --- | --- | --- | --- | --- | --- | --- | --- | --- | --- | --- | --- | --- | --- | --- | --- | --- | --- | --- | --- |
|  | **n** | **%** | **SE** | **n** | **%** | | **SE** | **n** | **%** | | **SE** | **n** | **%** | | **SE** | **n** | **%** | | **SE** | **n** | **%** | | **SE** | **n** | **%** | | **SE** |
| TOTAL | 1971 | 22,4 | 1,4 | 889 | 19,5 | | 1,5 | 754 | 18,8 | | 0,9 | 429 | 14,3 | | 1,1 | 352 | 13,5 | | 1 | 284 | 13,3 | | 1,3 | 231 | 12,7 | | 0,6 |
| 18-29 years old | 325 | 27,5 | 2,6 | 112 | 24,2 | | 2,5 | 85 | 21,2 | | 2,8 | 32 | 13 | | 2,4 | 25 | 11,6 | | 2,2 | 18 | 9,8 | | 2,4 | 15 | 10,5 | | 3,4 |
| 30-49 years old | 969 | 24,7 | 1,5 | 433 | 20,9 | | 1,7 | 365 | 18,8 | | 1,4 | 208 | 14,6 | | 1,6 | 168 | 14,5 | | 1,3 | 141 | 14,5 | | 1,4 | 113 | 14 | | 1 |
| 50 years old or more | 677 | 18,8 | 1,7 | 344 | 16,8 | | 1,7 | 304 | 18,2 | | 1,4 | 189 | 14,4 | | 1,2 | 159 | 12,8 | | 1,4 | 125 | 12,9 | | 1,3 | 103 | 11,8 | | 1 |
| Male | 281 | 17 | 0,8 | 123 | 15,7 | | 1,3 | 119 | 14,5 | | 2 | 63 | 11 | | 2,1 | 57 | 11,7 | | 2,1 | 46 | 11,2 | | 2 | 34 | 10,1 | | 1,9 |
| Female | 1690 | 24 | 1,6 | 766 | 20,6 | | 1,7 | 635 | 20 | | 1 | 366 | 15,3 | | 1,1 | 295 | 13,9 | | 0,9 | 238 | 13,9 | | 1,3 | 197 | 13,4 | | 0,6 |
| Medical doctor | 494 | 16,7 | 1,4 | 290 | 17,7 | | 2,4 | 207 | 13,9 | | 1,4 | 128 | 11,1 | | 0,9 | 107 | 11,1 | | 1,1 | 90 | 10,4 | | 1,6 | 61 | 7,9 | | 0,8 |
| Nurse | 685 | 25,6 | 1,6 | 283 | 20,6 | | 1,6 | 269 | 20,5 | | 1,3 | 138 | 13,5 | | 1,5 | 125 | 15 | | 1,5 | 97 | 14,4 | | 1,6 | 77 | 13 | | 1,4 |
| Nurse assistant | 280 | 30,5 | 3,4 | 91 | 24,6 | | 2,9 | 79 | 27,5 | | 3,4 | 38 | 20,5 | | 2,8 | 33 | 17,6 | | 3,6 | 25 | 16,8 | | 2,4 | 29 | 22,4 | | 3,2 |
| Other, involving patient care | 178 | 17,9 | 2 | 97 | 16,7 | | 2,5 | 78 | 16,2 | | 1,8 | 45 | 11,1 | | 1,8 | 34 | 10,8 | | 1,7 | 30 | 13,1 | | 2,4 | 22 | 12,2 | | 2,2 |
| Other, not involving patient care | 334 | 21,6 | 2,6 | 128 | 17,7 | | 3,1 | 121 | 17,9 | | 2,2 | 80 | 17,2 | | 3,4 | 53 | 12,9 | | 2,6 | 42 | 13,5 | | 2,7 | 42 | 13,2 | | 2,9 |
| No pre-pandemic mental disorders | 845 | 16,2 | 1,3 | 374 | 14,3 | | 1 | 300 | 12,6 | | 0,9 | 164 | 9,3 | | 1 | 154 | 10,1 | | 1,1 | 109 | 8,8 | | 0,9 | 93 | 9,5 | | 0,9 |
| 1 pre-pandemic mental disorders | 811 | 28,3 | 1,8 | 376 | 24,6 | | 2,2 | 346 | 26,9 | | 0,9 | 203 | 21,4 | | 1,8 | 149 | 17,1 | | 1,2 | 138 | 19,8 | | 2 | 102 | 15,4 | | 1,8 |
| ≥2 pre-pandemic mental disorders | 315 | 44,3 | 2,5 | 139 | 35,6 | | 4,4 | 108 | 30,7 | | 3,7 | 62 | 22,5 | | 3,5 | 49 | 22,7 | | 3,5 | 37 | 19,7 | | 3,7 | 36 | 24,9 | | 2,4 |

**Supplementary Table 6. Prevalence of panic disorder by distal factors.**

|  | **TIME 1** | | | | | **TIME 2** | | | | **TIME 3** | | | | **TIME 4** | | | | **TIME 5** | | | | **TIME 6** | | | | **TIME 7** | |
| --- | --- | --- | --- | --- | --- | --- | --- | --- | --- | --- | --- | --- | --- | --- | --- | --- | --- | --- | --- | --- | --- | --- | --- | --- | --- | --- | --- |
|  | **n** | **%** | **SE** | **n** | **%** | | **SE** | **n** | **%** | | **SE** | **n** | **%** | | **SE** | **n** | **%** | | **SE** | **n** | **%** | | **SE** | **n** | **%** | | **SE** |
| TOTAL | 2035 | 23,9 | 1,2 | 796 | 19,3 | | 1,3 | 651 | 17,1 | | 0,9 | 400 | 14,4 | | 1 | 341 | 14,1 | | 1 | 267 | 13 | | 1,1 | 252 | 13,3 | | 0,9 |
| 18-29 years old | 378 | 31,9 | 1,9 | 118 | 25,4 | | 2,8 | 99 | 24,5 | | 2,4 | 48 | 19 | | 2,7 | 40 | 19,1 | | 3,1 | 26 | 17 | | 1,8 | 25 | 15,9 | | 2,6 |
| 30-49 years old | 973 | 25,3 | 1,1 | 376 | 19,7 | | 1,3 | 309 | 16,2 | | 0,6 | 188 | 13,4 | | 1,2 | 170 | 14,4 | | 1,5 | 129 | 12,6 | | 1,4 | 120 | 14 | | 1,4 |
| 50 years old or more | 684 | 20,4 | 1,4 | 302 | 17,5 | | 1,5 | 243 | 16,2 | | 1,3 | 164 | 14,3 | | 0,9 | 131 | 12,4 | | 1,2 | 112 | 12,6 | | 1,2 | 107 | 12 | | 1,3 |
| Male | 267 | 17,3 | 1,5 | 108 | 14,3 | | 1,8 | 70 | 9,6 | | 1,4 | 48 | 8,4 | | 0,9 | 38 | 7,9 | | 1,3 | 36 | 9,3 | | 1,6 | 35 | 8,9 | | 1,9 |
| Female | 1768 | 25,8 | 1,4 | 688 | 20,8 | | 1,4 | 581 | 19,4 | | 1,1 | 352 | 16,2 | | 1,2 | 303 | 15,7 | | 1,3 | 231 | 14,1 | | 1,3 | 217 | 14,5 | | 0,8 |
| Medical doctor | 402 | 14,1 | 0,8 | 188 | 11,8 | | 1,2 | 145 | 10,2 | | 0,7 | 89 | 8,7 | | 0,9 | 76 | 8 | | 0,8 | 59 | 7 | | 1,4 | 64 | 9,2 | | 1 |
| Nurse | 672 | 24,2 | 1,1 | 252 | 19,2 | | 1,2 | 213 | 16,9 | | 1,5 | 120 | 12,6 | | 1,9 | 113 | 13,7 | | 1,2 | 88 | 13,7 | | 1 | 79 | 13,7 | | 1,8 |
| Nurse assistant | 338 | 38,8 | 3,7 | 103 | 28,7 | | 4,3 | 79 | 28 | | 2,2 | 55 | 27,5 | | 3,5 | 48 | 27,3 | | 5,1 | 29 | 19,9 | | 3,1 | 23 | 17,1 | | 3,9 |
| Other, involving patient care | 227 | 22,2 | 2,2 | 101 | 19,1 | | 2,3 | 74 | 15,2 | | 1,9 | 53 | 13,7 | | 1,9 | 44 | 14,4 | | 2,3 | 37 | 16,3 | | 2,5 | 37 | 17,6 | | 3 |
| Other, not involving patient care | 396 | 26,8 | 3,6 | 152 | 23,8 | | 4,4 | 140 | 20,5 | | 2,1 | 83 | 16,3 | | 2,7 | 60 | 14,4 | | 2,1 | 54 | 14,9 | | 1,5 | 49 | 14,2 | | 2,7 |
| No pre-pandemic mental disorders | 785 | 15,4 | 1,1 | 280 | 11,4 | | 0,9 | 246 | 10,8 | | 0,7 | 142 | 9,3 | | 0,8 | 121 | 8,6 | | 0,6 | 85 | 6,7 | | 1,2 | 84 | 7,5 | | 0,7 |
| 1 pre-pandemic mental disorders | 928 | 34,4 | 1,7 | 396 | 29,7 | | 2,4 | 305 | 25,5 | | 1,2 | 196 | 20,4 | | 1,5 | 166 | 20,9 | | 1,7 | 139 | 21,6 | | 1,6 | 125 | 19,8 | | 1,4 |
| ≥2 pre-pandemic mental disorders | 322 | 44 | 2,4 | 120 | 35 | | 3,8 | 100 | 29,1 | | 3,2 | 62 | 26,3 | | 3,8 | 54 | 26,2 | | 2,8 | 43 | 24,1 | | 2,5 | 43 | 28,7 | | 2,4 |

**Supplementary Table 7. Prevalence of post-traumatic stress disorder by distal factors.**

|  | **TIME 1** | | | | | **TIME 2** | | | | **TIME 3** | | | | **TIME 4** | | | | **TIME 5** | | | | **TIME 6** | | | | **TIME 7** | |
| --- | --- | --- | --- | --- | --- | --- | --- | --- | --- | --- | --- | --- | --- | --- | --- | --- | --- | --- | --- | --- | --- | --- | --- | --- | --- | --- | --- |
|  | **n** | **%** | **SE** | **n** | **%** | | **SE** | **n** | **%** | | **SE** | **n** | **%** | | **SE** | **n** | **%** | | **SE** | **n** | **%** | | **SE** | **n** | **%** | | **SE** |
| TOTAL | 1910 | 22,1 | 1,3 | 947 | 21 | | 1,9 | 765 | 19,3 | | 0,9 | 364 | 13,6 | | 0,9 | 333 | 13,3 | | 0,9 | 219 | 11 | | 1 | 193 | 10,6 | | 1,3 |
| 18-29 years old | 278 | 22,6 | 2,5 | 110 | 22,9 | | 2,6 | 68 | 15,6 | | 2,7 | 29 | 12,4 | | 2,3 | 24 | 11 | | 1,6 | 12 | 6,9 | | 2,2 | 9 | 5,6 | | 1,7 |
| 30-49 years old | 917 | 24 | 1,5 | 461 | 23,1 | | 2,1 | 374 | 20,2 | | 1,5 | 174 | 14 | | 1,3 | 160 | 14,2 | | 1,2 | 102 | 11,6 | | 1,3 | 94 | 12,1 | | 1,4 |
| 50 years old or more | 715 | 20 | 1,6 | 376 | 18,4 | | 2,3 | 323 | 19,4 | | 1,2 | 161 | 13,4 | | 1,2 | 149 | 12,9 | | 1,2 | 105 | 11,4 | | 1,2 | 90 | 10,3 | | 1,5 |
| Male | 246 | 15,5 | 0,9 | 132 | 17,1 | | 1,8 | 108 | 13,9 | | 1,4 | 56 | 10,4 | | 1,6 | 49 | 10,8 | | 1,6 | 40 | 10,1 | | 1,8 | 27 | 8,6 | | 1,6 |
| Female | 1664 | 24 | 1,5 | 815 | 22,2 | | 2 | 657 | 20,9 | | 1,1 | 308 | 14,5 | | 1 | 284 | 14 | | 1,1 | 179 | 11,3 | | 1 | 166 | 11,1 | | 1,4 |
| Medical doctor | 407 | 13,6 | 1,3 | 242 | 13,7 | | 2 | 159 | 9,9 | | 1,3 | 81 | 7 | | 1 | 79 | 7,6 | | 0,9 | 56 | 6,3 | | 1,3 | 39 | 5,1 | | 0,6 |
| Nurse | 685 | 25,1 | 1,9 | 331 | 24 | | 2,5 | 294 | 21,9 | | 1,8 | 122 | 13,3 | | 1,1 | 122 | 14,4 | | 1 | 75 | 11,7 | | 1,4 | 71 | 12,1 | | 1,8 |
| Nurse assistant | 295 | 33,8 | 2,5 | 109 | 29,2 | | 3,7 | 91 | 30,7 | | 2,8 | 44 | 22,8 | | 2,8 | 43 | 23,2 | | 4,7 | 28 | 18,9 | | 4,1 | 24 | 18,2 | | 3,5 |
| Other, involving patient care | 184 | 18,6 | 2,2 | 118 | 21,3 | | 2,9 | 84 | 17,6 | | 2,6 | 48 | 12,6 | | 1,6 | 33 | 10,9 | | 1,5 | 24 | 10,3 | | 1,8 | 21 | 10 | | 2,8 |
| Other, not involving patient care | 339 | 22,3 | 2,4 | 147 | 20,3 | | 4,1 | 137 | 20,7 | | 2,8 | 69 | 16,8 | | 4,5 | 56 | 14,4 | | 2,8 | 36 | 12,2 | | 2,1 | 38 | 11,7 | | 2,4 |
| No pre-pandemic mental disorders | 871 | 16,7 | 1,3 | 408 | 15,5 | | 1,5 | 323 | 14,1 | | 0,6 | 148 | 9 | | 0,8 | 154 | 10,7 | | 0,9 | 93 | 8,1 | | 0,9 | 85 | 8,1 | | 1,3 |
| 1 pre-pandemic mental disorders | 761 | 27,5 | 1,4 | 393 | 26,3 | | 2,6 | 325 | 24,5 | | 1,5 | 159 | 18,6 | | 2,5 | 136 | 16,2 | | 1,1 | 95 | 14,7 | | 1,8 | 84 | 13,5 | | 1,7 |
| ≥2 pre-pandemic mental disorders | 278 | 40 | 2,7 | 146 | 39 | | 5 | 117 | 36 | | 2,7 | 57 | 25,6 | | 3,1 | 43 | 20,4 | | 3,1 | 31 | 17,3 | | 2,6 | 24 | 16,6 | | 2,3 |

**Supplementary Table 8. Prevalence of substance use disorder by distal factors.**

|  | **TIME 1** | | | | | **TIME 2** | | | | **TIME 3** | | | | **TIME 4** | | | | **TIME 5** | | | | **TIME 6** | | | | **TIME 7** | |
| --- | --- | --- | --- | --- | --- | --- | --- | --- | --- | --- | --- | --- | --- | --- | --- | --- | --- | --- | --- | --- | --- | --- | --- | --- | --- | --- | --- |
|  | **n** | **%** | **SE** | **n** | **%** | | **SE** | **n** | **%** | | **SE** | **n** | **%** | | **SE** | **n** | **%** | | **SE** | **n** | **%** | | **SE** | **n** | **%** | | **SE** |
| TOTAL | 571 | 6,3 | 0,3 | 306 | 6,7 | | 0,4 | 314 | 6,9 | | 0,6 | 245 | 7,1 | | 0,4 | 192 | 6,3 | | 0,4 | 145 | 6,2 | | 0,4 | 146 | 6,6 | | 0,5 |
| 18-29 years old | 110 | 9,8 | 0,9 | 43 | 8 | | 1,3 | 52 | 9,9 | | 1,6 | 35 | 11,5 | | 1,7 | 21 | 9 | | 1,9 | 10 | 7,4 | | 2 | 10 | 7,3 | | 2,8 |
| 30-49 years old | 283 | 6,9 | 0,5 | 149 | 7,6 | | 0,8 | 148 | 7,7 | | 1 | 122 | 7,8 | | 0,6 | 89 | 6,1 | | 0,7 | 72 | 6,9 | | 0,8 | 76 | 7,8 | | 0,7 |
| 50 years old or more | 178 | 4,8 | 0,4 | 114 | 5,5 | | 0,5 | 114 | 5,2 | | 1 | 88 | 5,3 | | 0,6 | 82 | 5,9 | | 0,5 | 63 | 5,2 | | 0,4 | 60 | 5,3 | | 0,7 |
| Male | 144 | 8,1 | 0,8 | 97 | 11,6 | | 1 | 97 | 10,4 | | 1 | 74 | 11,6 | | 1,1 | 53 | 9,4 | | 1,5 | 49 | 11,2 | | 1,9 | 45 | 9,9 | | 1,8 |
| Female | 427 | 5,8 | 0,3 | 209 | 5,4 | | 0,4 | 217 | 5,8 | | 0,6 | 171 | 5,8 | | 0,5 | 139 | 5,5 | | 0,4 | 96 | 4,9 | | 0,4 | 101 | 5,7 | | 0,6 |
| Medical doctor | 201 | 6,8 | 0,5 | 118 | 7,2 | | 0,7 | 115 | 7 | | 0,9 | 95 | 7,6 | | 1 | 78 | 6,9 | | 1 | 64 | 8 | | 1,2 | 68 | 9,1 | | 1,3 |
| Nurse | 147 | 5,7 | 0,7 | 77 | 5,3 | | 0,8 | 99 | 7,4 | | 1,3 | 62 | 5,9 | | 0,9 | 45 | 5,1 | | 0,9 | 35 | 5,3 | | 0,9 | 39 | 6,1 | | 1 |
| Nurse assistant | 50 | 5,3 | 0,7 | 24 | 6,3 | | 1,1 | 18 | 6 | | 1,2 | 16 | 7,3 | | 1,7 | 8 | 3,6 | | 1,6 | 5 | 3,1 | | 1,5 | 5 | 4,5 | | 2 |
| Other, involving patient care | 65 | 7,6 | 1,1 | 37 | 9 | | 2 | 36 | 8,9 | | 1,8 | 34 | 10,9 | | 2,2 | 23 | 7,3 | | 1,7 | 19 | 8,4 | | 1,6 | 17 | 8,4 | | 1,5 |
| Other, not involving patient care | 108 | 6,6 | 0,5 | 50 | 7,6 | | 0,8 | 46 | 5,5 | | 0,9 | 38 | 6,5 | | 1,5 | 38 | 8,9 | | 2,7 | 22 | 6 | | 1,4 | 17 | 4,3 | | 1,1 |
| No pre-pandemic mental disorders | 219 | 4 | 0,3 | 130 | 4,9 | | 0,5 | 140 | 5,2 | | 0,7 | 104 | 5 | | 0,5 | 87 | 4,4 | | 0,5 | 64 | 4,6 | | 0,6 | 74 | 5,7 | | 0,7 |
| 1 pre-pandemic mental disorders | 225 | 7,8 | 0,6 | 111 | 7 | | 0,7 | 116 | 8 | | 0,7 | 89 | 8,1 | | 0,8 | 69 | 7,7 | | 0,8 | 55 | 7,2 | | 0,9 | 52 | 7,5 | | 1,3 |
| ≥2 pre-pandemic mental disorders | 127 | 16,9 | 1,2 | 65 | 18,5 | | 2,6 | 58 | 14,3 | | 2,6 | 52 | 17,5 | | 2 | 36 | 14,7 | | 2,2 | 26 | 13,8 | | 1,8 | 20 | 9,6 | | 4,5 |

**Supplementary Table 9. Comparison of latent class growth analysis models for any probable mental disorder (MDx) and suicidal thoughts and behaviors (STB).**

|  | | |  |  | | |  |  |  | **LMRA-LRT** | | |  |
| --- | --- | --- | --- | --- | --- | --- | --- | --- | --- | --- | --- | --- | --- |
|  | | | **Model** | **AIC** | | | **BIC** | **ssa-BIC** | **Entropy** | **LMRA-LRT*** | | **p-val** | **Latent classes distribution** |
| **LCGA (Classes - with no random effects) for any mental disorder** | | | | | | | | | | | | | |
| Linear- Equal time space - 2classes | | | LCGA-2-WT | 13163.6 | | | 13191.3 | 13175.4 | 0.848 | 3296.59 | | <0.001 | 59.5%;40.6% |
| Linear- Equal time space - 3classes | | | LCGA-3-WT | 12822.9 | | | 12867.1 | 12841.7 | 0.764 | 332.044 | | <0.001 | 45.6%;34.9%;19.4% |
|  | | |  |  | | |  |  |  |  | |  |  |
| Linear- Equal time space - 4classes | | | LCGA-4 | 12751.8 | | | 12812.7 | 12777.7 | 0.748 | 73.785 | | 0.009 | 19.6%;8.3%;26.1%;46.0% |
| Linear- Equal time space - 5classes | | | LCGA-5 | 12717.0 | | | 12794.4 | 12749.9 | 0.656 | 42.987 | | <0.001 | 10.6%;24.7%;16.7%;18.0%;30.0% |
| Linear- Equal time space - 6classes | | | LCGA-6 | 12712.7 | | | 12806.8 | 12752.8 | 0.686 | 9.784 | | 0.23 | 8.7%;17.6%;2.9%;27.3%;16.5%;26.9% |
| **LCGA (Classes - with no random effects) for suicidal thoughts and behaviors** | | | | | | | | | | | | | |
| Linear- Equal time space - 2classes | | | LCGA-2-WT | 5934.314 | | | 5961.969 | 5946.084 | 0.92 | 1968.141 | | <0.001 |  |
| Linear- Equal time space - 3classes | | | LCGA-3-WT | 5.777 | | | 5821.473 | 5796.057 | 0.842 | 156.176 | | <0.001 | 80%;5.2%;14.9% |
| Linear- Equal time space - 4classes | | | LCGA-4 | 5735.876 | | | 5796.717 | 5761.77 | 0.866 | 45342 | | 0.006 | 7%;5.2%.81.8%;5.9% |
| Linear- Equal time space - 5classes | | | LCGA-5 | 5739.207 | | | 5816.614 | 5772.163 | 0.874 | 2.556 | | 0.563 | 81.6%;0.7%;4.7%;5.8%7.1% |
|  |  |  | | |  |  | | | | |

**Supplementary Table 10. Any mental disorder 4-classes latent class growth analysis model.**

| Variable level | Overall | Class i | Class ii | Class iii | Class iv | p-value |
| --- | --- | --- | --- | --- | --- | --- |
|  |  | n(%)* | n(%)* | n(%)* | n(%)* |  |
|  | 1843.3 | 357.4 (19.4) | 525.9 (28.5) | 109.2 (5.9) | 850.8 (46.2) |  |
| 18-29 years old | 197.4 (10.7) | 26.4 ( 7.4) | 69.5 (13.2) | 20.1 (18.4) | 81.4 ( 9.6) | **0.0062** |
| 30-49 years old | 836.3 (45.4) | 170.0 (47.6) | 264.4 (50.3) | 40.3 (36.9) | 361.6 (42.5) | |
| 50 years old or more | 809.6 (43.9) | 161.0 (45.1) | 192.1 (36.5) | 48.7 (44.6) | 407.8 (47.9) | |
| Male | 391.6 (21.2) | 78.1 (21.9) | 84.9 (16.1) | 25.8 (23.6) | 202.8 (23.8) | 0.0553 |
| Female | 1451.7 (78.8) | 279.3 (78.1) | 441.0 (83.9) | 83.4 (76.4) | 648.0 (76.2) | |
| Marital status - Married | 973.8 (52.8) | 188.3 (52.7) | 270.5 (51.4) | 48.3 (44.2) | 466.7 (54.9) | 0.3252 |
| Marital status - Single, divorced, legally separated, or widowed | 869.5 (47.2) | 169.1 (47.3) | 255.4 (48.6) | 60.9 (55.8) | 384.1 (45.1) | |
| No children in care | 1080.9 (58.6) | 212.8 (59.5) | 302.1 (57.4) | 67.9 (62.2) | 498.1 (58.5) | 0.8695 |
| Children in care | 762.4 (41.4) | 144.6 (40.5) | 223.9 (42.6) | 41.2 (37.8) | 352.7 (41.5) | |
| Workplace - Hospital | 1085.4 (58.9) | 218.2 (61.0) | 306.1 (58.2) | 67.4 (61.7) | 493.7 (58.0) | 0.1175 |
| Workplace - Primary Care | 641.9 (34.8) | 130.8 (36.6) | 186.5 (35.5) | 33.0 (30.2) | 291.7 (34.3) | |
| Workplace - Others | 116.0 ( 6.3) | 8.5 ( 2.4) | 33.4 ( 6.3) | 8.8 ( 8.1) | 65.4 ( 7.7) |  |
| Medical doctor | 519.5 (28.2) | 81.7 (22.9) | 123.3 (23.4) | 26.8 (24.5) | 287.7 (33.8) | 0.0018 |
| Nurse | 567.5 (30.8) | 98.9 (27.7) | 203.2 (38.6) | 38.4 (35.2) | 227.0 (26.7) | |
| Nurse assistant | 221.6 (12.0) | 60.0 (16.8) | 64.4 (12.3) | 10.1 ( 9.2) | 87.0 (10.2) |  |
| Other profession involved in patient care | 190.1 (10.3) | 36.7 (10.3) | 50.2 ( 9.5) | 12.9 (11.8) | 90.4 (10.6) |  |
| Other profession not involved in patient care | 344.6 (18.7) | 80.0 (22.4) | 84.8 (16.1) | 21.0 (19.2) | 158.7 (18.7) | |
| No pre-pandemic lifetime mental disorders | 1087.1 (59.0) | 144.1 (40.3) | 238.2 (45.3) | 54.3 (49.8) | 650.4 (76.4) | **<0.0001** |
| One pre-pandemic lifetime mental disorders | 608.3 (33.0) | 159.9 (44.7) | 225.4 (42.9) | 47.3 (43.3) | 175.7 (20.7) | |
| Two or more pre-pandemic lifetime mental disorders | 147.9 ( 8.0) | 53.3 (14.9) | 62.4 (11.9) | 7.6 ( 6.9) | 24.6 ( 2.9) |  |
| No physical health conditions | 1357.1 (73.6) | 223.2 (62.4) | 377.2 (71.7) | 80.8 (74.0) | 675.9 (79.4) | **<0.0001** |
| One physical health conditions | 421.0 (22.8) | 107.0 (29.9) | 128.3 (24.4) | 26.6 (24.4) | 159.0 (18.7) | |
| Two or more physical health conditions | 65.2 ( 3.5) | 27.3 ( 7.6) | 20.4 ( 3.9) | 1.8 ( 1.6) | 15.8 ( 1.9) |  |
| Average weekly hours worked - 40 hours or less | 1161.3 (63.0) | 220.6 (61.7) | 330.5 (62.8) | 64.4 (59.0) | 545.8 (64.1) | 0.5479 |
| Average weekly hours worked - 41-50 hours | 425.9 (23.1) | 95.2 (26.6) | 117.7 (22.4) | 31.1 (28.5) | 181.9 (21.4) | |
| Average weekly hours worked - 51 hours or more | 256.1 (13.9) | 41.6 (11.6) | 77.8 (14.8) | 13.6 (12.5) | 123.1 (14.5) | |
| No changes at workplace | 844.6 (45.8) | 163.9 (45.9) | 212.2 (40.4) | 50.3 (46.1) | 418.2 (49.2) | 0.2868 |
| Changed of team or assigned functions | 598.3 (32.5) | 112.2 (31.4) | 193.5 (36.8) | 34.0 (31.2) | 258.6 (30.4) | |
| Changed to specific COVID-19 related work location | 400.4 (21.7) | 81.3 (22.7) | 120.2 (22.8) | 24.9 (22.8) | 174.0 (20.5) | |
| Not having to prioritize among COVID-19 patients at work | 1524.7 (82.7) | 290.8 (81.4) | 425.5 (80.9) | 96.3 (88.2) | 712.0 (83.7) | 0.3065 |
| Having to prioritize care among COVID-19 patients at work | 318.6 (17.3) | 66.6 (18.6) | 100.4 (19.1) | 12.9 (11.8) | 138.7 (16.3) | |
| Not having patient(s) in care that died from COVID-19 infection | 1095.9 (59.5) | 206.5 (57.8) | 307.0 (58.4) | 67.9 (62.2) | 514.5 (60.5) | 0.8157 |
| Having patient(s) in care that died from COVID-19 infection | 747.4 (40.5) | 150.9 (42.2) | 218.9 (41.6) | 41.3 (37.8) | 336.3 (39.5) | |
| No significant loss of personal or familial income due to COVID-19 | 1482.8 (80.4) | 280.1 (78.4) | 418.0 (79.5) | 78.4 (71.8) | 706.3 (83.0) | 0.0982 |
| Significant loss of personal or familial income due to COVID-19 | 360.5 (19.6) | 77.2 (21.6) | 108.0 (20.5) | 30.8 (28.2) | 144.5 (17.0) | |
| Perceived frequency of lack of protective equipment - Never | 185.2 (10.0) | 29.1 ( 8.2) | 35.5 ( 6.7) | 15.9 (14.6) | 104.7 (12.3) | **<0.0001** |
| Perceived frequency of lack of protective equipment - 1 | 264.9 (14.4) | 28.7 ( 8.0) | 51.0 ( 9.7) | 13.2 (12.1) | 172.1 (20.2) | |
| Perceived frequency of lack of protective equipment - 2 | 703.1 (38.1) | 127.7 (35.7) | 210.9 (40.1) | 29.8 (27.3) | 334.7 (39.3) | |
| Perceived frequency of lack of protective equipment - 3 | 477.5 (25.9) | 103.0 (28.8) | 154.8 (29.4) | 37.0 (33.9) | 182.8 (21.5) | |
| Perceived frequency of lack of protective equipment - Always | 212.5 (11.5) | 68.9 (19.3) | 73.8 (14.0) | 13.3 (12.2) | 56.5 ( 6.6) |  |
| Perceived lack of preparedness at work- Never | 132.8 ( 7.2) | 14.1 ( 3.9) | 15.1 ( 2.9) | 5.4 ( 5.0) | 98.2 (11.5) | **<0.0001** |
| Perceived lack of preparedness at work 1 | 405.6 (22.0) | 43.2 (12.1) | 104.9 (19.9) | 23.1 (21.1) | 234.4 (27.6) | |
| Perceived lack of preparedness at work- 2 | 661.2 (35.9) | 125.1 (35.0) | 189.3 (36.0) | 36.9 (33.8) | 309.9 (36.4) | |
| Perceived lack of preparedness at work- 3 | 495.4 (26.9) | 117.7 (32.9) | 160.7 (30.6) | 40.5 (37.1) | 176.5 (20.7) | |
| Perceived lack of preparedness at work- Always | 148.3 ( 8.0) | 57.3 (16.0) | 55.9 (10.6) | 3.3 ( 3.0) | 31.8 ( 3.7) |  |
| Personal health-related stress - None | 105.0 ( 5.7) | 4.1 ( 1.2) | 14.2 ( 2.7) | 2.4 ( 2.2) | 84.3 ( 9.9) | **<0.0001** |
| Personal health-related stress -1 | 492.5 (26.7) | 54.5 (15.2) | 90.7 (17.2) | 32.1 (29.4) | 315.2 (37.1) | |
| Personal health-related stress - 2 | 654.1 (35.5) | 119.1 (33.3) | 200.4 (38.1) | 46.4 (42.5) | 288.2 (33.9) | |
| Personal health-related stress - 3 | 418.3 (22.7) | 106.7 (29.9) | 163.6 (31.1) | 18.8 (17.3) | 129.2 (15.2) | |
| Personal health-related stress - Very intense | 173.3 ( 9.4) | 73.0 (20.4) | 57.1 (10.8) | 9.4 ( 8.6) | 33.9 ( 4.0) |  |
| Health-related stress loved ones - None | 18.6 ( 1.0) | 0.0 ( 0.0) | 0.3 ( 0.1) | 0.0 ( 0.0) | 18.3 ( 2.2) | **<0.0001** |
| Health-related stress loved ones - 1 | 178.7 ( 9.7) | 7.4 ( 2.1) | 21.7 ( 4.1) | 11.1 (10.2) | 138.5 (16.3) | |
| Health-related stress loved ones - 2 | 515.6 (28.0) | 66.5 (18.6) | 108.8 (20.7) | 32.6 (29.9) | 307.7 (36.2) | |
| Health-related stress loved ones - 3 | 559.5 (30.4) | 107.1 (30.0) | 179.9 (34.2) | 34.4 (31.5) | 238.1 (28.0) | |
| Health-related stress loved ones - Very intense | 570.8 (31.0) | 176.4 (49.3) | 215.2 (40.9) | 31.1 (28.5) | 148.2 (17.4) | |
| Financial stress - None | 603.2 (32.7) | 77.6 (21.7) | 137.7 (26.2) | 27.1 (24.8) | 360.8 (42.4) | **<0.0001** |
| Financial stress - 1 | 581.8 (31.6) | 119.9 (33.6) | 169.5 (32.2) | 34.7 (31.8) | 257.7 (30.3) | |
| Financial stress - 2 | 388.3 (21.1) | 90.1 (25.2) | 119.1 (22.6) | 22.3 (20.5) | 156.8 (18.4) | |
| Financial stress - 3 | 190.7 (10.3) | 49.3 (13.8) | 67.6 (12.8) | 16.5 (15.1) | 57.3 ( 6.7) |  |
| Financial stress - Very intense | 79.2 ( 4.3) | 20.4 ( 5.7) | 32.1 ( 6.1) | 8.5 ( 7.7) | 18.3 ( 2.2) |  |
| Stress related to relations with others - None | 182.0 ( 9.9) | 8.7 ( 2.4) | 20.5 ( 3.9) | 10.5 ( 9.6) | 142.3 (16.7) | **<0.0001** |
| Stress related to relations with others - 1 | 587.7 (31.9) | 65.8 (18.4) | 119.7 (22.8) | 36.9 (33.8) | 365.3 (42.9) | |
| Stress related to relations with others - 2 | 627.2 (34.0) | 133.8 (37.4) | 206.9 (39.3) | 39.7 (36.4) | 246.8 (29.0) | |
| Stress related to relations with others - 3 | 379.8 (20.6) | 130.5 (36.5) | 146.0 (27.8) | 20.9 (19.1) | 82.4 ( 9.7) |  |
| Stress related to relations with others - Very intense | 66.5 ( 3.6) | 18.5 ( 5.2) | 32.8 ( 6.2) | 1.2 ( 1.1) | 14.1 ( 1.7) |  |
| No positive COVID-19 diagnosis | 1485.8 (80.6) | 276.9 (77.5) | 416.7 (79.2) | 91.0 (83.3) | 701.2 (82.4) | 0.3143 |
| positive COVID-19 diagnosis | 357.5 (19.4) | 80.4 (22.5) | 109.3 (20.8) | 18.2 (16.7) | 149.6 (17.6) | |
| No close ones infected with COVID-19 | 721.0 (39.1) | 123.7 (34.6) | 204.3 (38.9) | 35.5 (32.5) | 357.4 (42.0) | 0.1586 |
| Close ones infected with COVID-19 | 1122.3 (60.9) | 233.7 (65.4) | 321.6 (61.1) | 73.6 (67.5) | 493.3 (58.0) | |

*weighted n, weighted %

**Supplementary Table 11. Suicidal thoughts and behaviors 4-classes latent class growth analysis model.**

| Variable level | Overall | Class i | Class ii | Class iii | Class iv | p-value |
| --- | --- | --- | --- | --- | --- | --- |
|  | n | n (%)* | n (%)* | n (%)* | n (%)* |  |
| TOTAL | 1843.3 | 92.9 (5.0) | 96.4 (5.2) | 77.7 (4.2) | 1576.3 (85.5) |  |
| 18-29 years old | 197.4 (10.7) | 1.7 (1.8) | 9.4 (9.7) | 7.0 (9.0) | 179.4 (11.4) | 0.0583 |
| 30-49 years old | 836.3 (45.4) | 35.6 (38.3) | 41.0 (42.6) | 43.7 (56.2) | 716.0 (45.4) | |
| 50 years old or more | 809.6 (43.9) | 55.6 (59.9) | 46.0 (47.7) | 27.1 (34.8) | 680.9 (43.2) | |
| Male | 391.6 (21.2) | 19.1 (20.6) | 19.9 (20.6) | 12.7 (16.3) | 339.9 (21.6) | 0.8410 |
| Female | 1451.7 (78.8) | 73.7 (79.4) | 76.5 (79.4) | 65.1 (83.7) | 1236.4 (78.4) | |
| Marital status - Married | 973.8 (52.8) | 47.5 (51.2) | 45.5 (47.2) | 46.4 (59.7) | 834.4 (52.9) | 0.6184 |
| Marital status - Single, divorced, legally separated, or widowed | 869.5 (47.2) | 45.3 (48.8) | 50.9 (52.8) | 31.3 (40.3) | 742.0 (47.1) | |
| No children in care | 1080.9 (58.6) | 64.1 (69.1) | 64.9 (67.3) | 41.7 (53.7) | 910.2 (57.7) | 0.1538 |
| Children in care | 762.4 (41.4) | 28.7 (30.9) | 31.5 (32.7) | 36.0 (46.3) | 666.1 (42.3) | |
| Workplace - Hospital | 1085.4 (58.9) | 42.2 (45.5) | 52.3 (54.2) | 48.8 (62.8) | 942.0 (59.8) | **0.0410** |
| Workplace - Primary Care | 641.9 (34.8) | 48.8 (52.5) | 37.7 (39.1) | 25.9 (33.4) | 529.5 (33.6) | |
| Workplace - Others | 116.0 ( 6.3) | 1.8 ( 2.0) | 6.5 ( 6.7) | 2.9 ( 3.8) | 104.8 ( 6.6) | |
| Medical doctor | 519.5 (28.2) | 18.5 (19.9) | 24.7 (25.6) | 12.3 (15.8) | 464.0 (29.4) | 0.0778 |
| Nurse | 567.5 (30.8) | 24.5 (26.4) | 24.2 (25.1) | 27.9 (35.9) | 490.9 (31.1) | |
| Nurse assistant | 221.6 (12.0) | 14.0 (15.1) | 8.3 ( 8.6) | 15.1 (19.4) | 184.2 (11.7) | |
| Other profession involved in patient care | 190.1 (10.3) | 7.8 ( 8.4) | 10.4 (10.8) | 10.0 (12.9) | 161.9 (10.3) | |
| Other profession not involved in patient care | 344.6 (18.7) | 28.1 (30.2) | 28.9 (29.9) | 12.5 (16.0) | 275.2 (17.5) | |
| No pre-pandemic lifetime mental disorders | 1087.1 (59.0) | 38.8 (41.8) | 21.3 (22.1) | 37.9 (48.8) | 989.0 (62.7) | **<0.0001** |
| One pre-pandemic lifetime mental disorders | 608.3 (33.0) | 34.8 (37.5) | 60.6 (62.9) | 34.5 (44.4) | 478.3 (30.3) | |
| Two or more pre-pandemic lifetime mental disorders | 147.9 ( 8.0) | 19.2 (20.7) | 14.4 (15.0) | 5.3 ( 6.9) | 109.0 ( 6.9) | |
| No physical health conditions | 1357.1 (73.6) | 51.2 (55.1) | 58.6 (60.8) | 57.6 (74.1) | 1189.7 (75.5) | **0.0006** |
| One physical health conditions | 421.0 (22.8) | 34.3 (36.9) | 27.5 (28.5) | 18.3 (23.5) | 341.0 (21.6) | |
| Two or more physical health conditions | 65.2 ( 3.5) | 7.4 ( 8.0) | 10.3 (10.7) | 1.9 ( 2.4) | 45.6 ( 2.9) |  |
| Average weekly hours worked - 40 hours or less | 1161.3 (63.0) | 55.2 (59.5) | 61.4 (63.6) | 61.5 (79.2) | 983.2 (62.4) | 0.2831 |
| Average weekly hours worked - 41-50 hours | 425.9 (23.1) | 22.6 (24.4) | 19.3 (20.0) | 10.4 (13.4) | 373.5 (23.7) | |
| Average weekly hours worked - 51 hours or more | 256.1 (13.9) | 15.0 (16.2) | 15.8 (16.3) | 5.7 ( 7.4) | 219.6 (13.9) | |
| No changes at work | 844.6 (45.8) | 46.8 (50.4) | 47.3 (49.1) | 34.8 (44.7) | 715.8 (45.4) | 0.3301 |
| Changed of team or assigned functions | 598.3 (32.5) | 33.9 (36.5) | 37.5 (38.9) | 25.3 (32.5) | 501.7 (31.8) | |
| Changed to specific COVID-19 related work location | 400.4 (21.7) | 12.2 (13.1) | 11.6 (12.1) | 17.7 (22.8) | 358.9 (22.8) | |
| Not having to make decisions regarding prioritizing care among COVID-19 patients | 1524.7 (82.7) | 77.2 (83.1) | 84.3 (87.5) | 69.4 (89.3) | 1293.8 (82.1) | 0.3006 |
| Having to make decisions regarding prioritizing care among COVID-19 patients | 318.6 (17.3) | 15.7 (16.9) | 12.1 (12.5) | 8.3 (10.7) | 282.5 (17.9) | |
| Work - Not having patient(s) in care that died from COVID-19 infection | 1095.9 (59.5) | 58.4 (62.9) | 66.7 (69.2) | 45.2 (58.2) | 925.5 (58.7) | 0.3849 |
| Work - Having patient(s) in care that died from COVID-19 infection | 747.4 (40.5) | 34.4 (37.1) | 29.7 (30.8) | 32.5 (41.8) | 650.8 (41.3) | |
| No significant loss of personal or familial income due to COVID-19 - No | 1482.8 (80.4) | 69.8 (75.1) | 67.9 (70.4) | 55.8 (71.8) | 1289.3 (81.8) | 0.0522 |
| Significant loss of personal or familial income due to COVID-19 | 360.5 (19.6) | 23.1 (24.9) | 28.5 (29.6) | 21.9 (28.2) | 287.0 (18.2) | |
| Perceived frequency of lack of protective equipment at work-never | 185.2 (10.0) | 7.7 ( 8.3) | 9.4 ( 9.7) | 4.7 ( 6.1) | 163.4 (10.4) | **0.0245** |
| Perceived frequency of lack of protective equipment at work- 1 | 264.9 (14.4) | 10.0 (10.8) | 11.0 (11.4) | 5.6 ( 7.2) | 238.4 (15.1) | |
| Perceived frequency of lack of protective equipment at work- 2 | 703.1 (38.1) | 29.2 (31.5) | 32.4 (33.6) | 35.0 (45.0) | 606.5 (38.5) | |
| Perceived frequency of lack of protective equipment at work- 3 | 477.5 (25.9) | 30.3 (32.7) | 20.2 (21.0) | 16.8 (21.6) | 410.2 (26.0) | |
| Perceived frequency of lack of protective equipment at work-always | 212.5 (11.5) | 15.6 (16.8) | 23.4 (24.3) | 15.6 (20.1) | 157.8 (10.0) | |
| Perceived lack of preparedness at work - Never | 132.8 ( 7.2) | 6.7 ( 7.2) | 1.7 ( 1.7) | 3.5 ( 4.5) | 121.0 ( 7.7) | **0.0001** |
| Perceived lack of preparedness at work - 1 | 405.6 (22.0) | 3.5 ( 3.8) | 16.7 (17.3) | 18.2 (23.5) | 367.2 (23.3) | |
| Perceived lack of preparedness at work - 2 | 661.2 (35.9) | 32.3 (34.8) | 31.8 (33.0) | 29.0 (37.3) | 568.1 (36.0) | |
| Perceived lack of preparedness at work - 3 | 495.4 (26.9) | 33.4 (36.0) | 27.5 (28.5) | 21.6 (27.8) | 412.9 (26.2) | |
| Perceived lack of preparedness at work - Always | 148.3 ( 8.0) | 17.0 (18.3) | 18.8 (19.5) | 5.4 ( 6.9) | 107.1 ( 6.8) | |
| Personal health-related stress - None | 105.0 ( 5.7) | 3.3 ( 3.5) | 2.2 ( 2.3) | 1.6 ( 2.1) | 97.8 ( 6.2) | **<0.0001** |
| Personal health-related stress -1 | 492.5 (26.7) | 18.0 (19.4) | 16.5 (17.2) | 21.9 (28.1) | 436.1 (27.7) | |
| Personal health-related stress - 2 | 654.1 (35.5) | 30.8 (33.2) | 21.3 (22.1) | 35.6 (45.8) | 566.4 (35.9) | |
| Personal health-related stress - 3 | 418.3 (22.7) | 24.0 (25.9) | 33.1 (34.4) | 9.7 (12.4) | 351.5 (22.3) | |
| Personal health-related stress - Very intense | 173.3 ( 9.4) | 16.7 (18.0) | 23.2 (24.1) | 9.0 (11.6) | 124.4 ( 7.9) | |
| Health-related stress loved ones - None | 18.6 ( 1.0) | 0.3 ( 0.3) | 0.0 ( 0.0) | 0.0 ( 0.0) | 18.3 ( 1.2) | **0.0001** |
| Health-related stress loved ones - 1 | 178.7 ( 9.7) | 4.0 ( 4.3) | 1.7 ( 1.8) | 3.0 ( 3.8) | 170.0 (10.8) | |
| Health-related stress loved ones - 2 | 515.6 (28.0) | 18.0 (19.4) | 17.0 (17.6) | 20.5 (26.4) | 460.1 (29.2) | |
| Health-related stress loved ones - 3 | 559.5 (30.4) | 23.7 (25.6) | 33.9 (35.2) | 37.2 (47.8) | 464.7 (29.5) | |
| Health-related stress loved ones - Very intense | 570.8 (31.0) | 46.8 (50.4) | 43.8 (45.4) | 17.1 (22.0) | 463.1 (29.4) | |
| Financial stress - None | 603.2 (32.7) | 13.7 (14.7) | 15.9 (16.5) | 20.2 (25.9) | 553.5 (35.1) | **<0.0001** |
| Financial stress - 1 | 581.8 (31.6) | 36.1 (38.8) | 27.3 (28.3) | 22.0 (28.2) | 496.5 (31.5) | |
| Financial stress - 2 | 388.3 (21.1) | 20.7 (22.2) | 26.8 (27.8) | 19.3 (24.8) | 321.6 (20.4) | |
| Financial stress - 3 | 190.7 (10.3) | 9.1 ( 9.8) | 15.4 (15.9) | 14.0 (18.1) | 152.2 ( 9.7) | |
| Financial stress - Very intense | 79.2 ( 4.3) | 13.4 (14.4) | 11.1 (11.5) | 2.3 ( 2.9) | 52.5 ( 3.3) |  |
| Stress related to relations with others - None | 182.0 ( 9.9) | 0.5 ( 0.5) | 1.3 ( 1.3) | 0.8 ( 1.0) | 179.4 (11.4) | **<0.0001** |
| Stress related to relations with others - 1 | 587.7 (31.9) | 12.4 (13.4) | 16.0 (16.6) | 19.4 (25.0) | 539.8 (34.2) | |
| Stress related to relations with others - 2 | 627.2 (34.0) | 42.6 (45.9) | 32.3 (33.5) | 36.8 (47.3) | 515.6 (32.7) | |
| Stress related to relations with others - 3 | 379.8 (20.6) | 30.6 (33.0) | 37.6 (39.0) | 18.3 (23.6) | 293.3 (18.6) | |
| Stress related to relations with others - Very intense | 66.5 ( 3.6) | 6.7 ( 7.3) | 9.2 ( 9.5) | 2.4 ( 3.1) | 48.2 ( 3.1) |  |
| No positive COVID-19 test or medical COVID-19 diagnosis | 1485.8 (80.6) | 70.6 (76.1) | 76.1 (78.9) | 66.1 (85.0) | 1273.0 (80.8) | 0.6770 |
| Positive COVID-19 test or medical COVID-19 diagnosis | 357.5 (19.4) | 22.2 (23.9) | 20.3 (21.1) | 11.7 (15.0) | 303.3 (19.2) | |
| No close ones infected with COVID-19 | 721.0 (39.1) | 33.7 (36.3) | 39.2 (40.6) | 25.0 (32.1) | 623.2 (39.5) | 0.7259 |
| Close ones infected with COVID-19 | 1122.3 (60.9) | 59.2 (63.7) | 57.2 (59.4) | 52.8 (67.9) | 953.1 (60.5) | |

*weighted n, weighted %
